# Supplementary material for: Identification of Key Genes in the Response toSalmonella enterica Enteritidis,Salmonella enterica Pullorum, and Poly(I:C) in Chicken Spleen and Caecum
Source: Hindawi journal article supplement (doi:10.1155/2014/154946), 2014-01-01
Supplement: f1 [file 154946.f1.pdf]

# **Identification of key genes in the response to *Salmonella enteritidis*, *Salmonella pullorum* and Poly(I:C) in chicken spleen and caecum**

Teng Ma<sup>a</sup>, Guobin Chang<sup>a\*</sup>, Rong Chen<sup>a</sup>, Zhongwei Sheng<sup>a</sup>, Aiqin Dai<sup>a</sup>, Fei Zhai<sup>a</sup>,  
Jianchao Li<sup>a</sup>, Mingxiu Xia<sup>a</sup>, Dengke Hua<sup>a</sup>, Lu Xu<sup>a</sup>, Hongzhi Wang<sup>a</sup>, Jing Chen<sup>a</sup>, Lu  
Liu<sup>a</sup>, Guohong Chen<sup>a\*</sup>

<sup>a</sup>Animal genetic resources laboratory, College of Animal Science and Technology,  
Yangzhou University, 88 South of University Ave., Yangzhou, Jiangsu, 225009, P. R.  
China

\*Correspondence to:

Guobin Chang, Ph.D.

Animal genetic resources laboratory, College of Animal Science and  
Technology, Yangzhou University, 88 South of University Ave.,  
Yangzhou, Jiangsu, 225009, P. R. China

Tel. +86-514-87979034

E-mail: passioncgb@163.com

Or Guohong Chen, Ph.D.

Animal genetic resources laboratory, College of Animal Science and  
Technology, Yangzhou University, 88 South of University Ave.,  
Yangzhou, Jiangsu, 225009, P. R. China

E-mail: ghchen@yzu.edu.cn

## Supplementary Tables

**Table S1-1** Upregulation of differentially expressed genes in the spleen in group SP with  $FC \geq 2$  and Signal Density of Raw Data  $\geq 100$ .

**Table S1-2** Downregulation of differentially expressed genes in the spleen in group SP with  $FC \geq 2$  and Signal Density of Raw Data  $\geq 100$ .

**Table S2-1** Upregulation of differentially expressed genes in the spleen in group SE with  $FC \geq 2$  and Signal Density of Raw Data  $\geq 100$ .

**Table S2-2** Downregulation of differentially expressed genes in the spleen in group SE with  $FC \geq 2$  and Signal Density of Raw Data  $\geq 100$ .

**Table S3-1** Upregulation of differentially expressed genes in the spleen in group Poly(I:C) with  $FC \geq 2$  and Signal Density of Raw Data  $\geq 100$ .

**Table S3-2** Downregulation of differentially expressed genes in the spleen in group Poly(I:C) with  $FC \geq 2$  and Signal Density of Raw Data  $\geq 100$ .

**Table S4-1** Upregulation of differentially expressed genes in the caecum in group SP with  $FC \geq 2$  and Signal Density of Raw Data  $\geq 100$ .

**Table S4-2** Downregulation of differentially expressed genes in the caecum in group SP with  $FC \geq 2$  and Signal Density of Raw Data  $\geq 100$ .

**Table S5-1** Upregulation of differentially expressed genes in the caecum in group SE with  $FC \geq 2$  and Signal Density of Raw Data  $\geq 100$ .

**Table S5-2** Downregulation of differentially expressed genes in the caecum in group SE with  $FC \geq 2$  and Signal Density of Raw Data  $\geq 100$ .

**Table S6-1** Upregulation of differentially expressed genes in the caecum in group Poly(I:C) with  $FC \geq 2$  and Signal Density of Raw Data  $\geq 100$ .

**Table S6-2** Downregulation of differentially expressed genes in the caecum in group Poly(I:C) with  $FC \geq 2$  and Signal Density of Raw Data  $\geq 100$ .

**Table S7** qRT-PCR primers for 5 target genes.

**Table S8** Statistical description of the difference in the expression of genes in each group in the spleen.

**Table S9** Statistical description of the difference in the expression of genes in each group in the caecum.

**Table S1-1** Upregulation of differentially expressed genes in the spleen in group SP with  $FC \geq 2$  and Signal Density of Raw Data  $\geq 100$ .

| ProbeName    | p-value | FC     | Regulation | GROUP<br>SP(Raw_data) | CONTROL_(Raw_data) | GeneSymbol |
|--------------|---------|--------|------------|-----------------------|--------------------|------------|
| A_87_P135073 | 0.0273  | 2.6414 | up         | 38479.96              | 21784.10           | RANGAP1    |
| A_87_P303693 | 0.0484  | 2.0890 | up         | 5867.15               | 4189.91            | Unknown    |
| A_87_P108768 | 0.0055  | 3.0862 | up         | 4046.30               | 1769.06            | Unknown    |
| A_87_P068266 | 0.0299  | 2.7656 | up         | 4204.96               | 2270.40            | OGCHI      |
| A_87_P063991 | 0.0130  | 2.4764 | up         | 2527.43               | 1473.75            | AIM1L      |
| A_87_P016314 | 0.0130  | 3.1166 | up         | 2407.87               | 1143.18            | Unknown    |
| A_87_P013273 | 0.0009  | 2.8880 | up         | 2099.30               | 1030.90            | Unknown    |
| A_87_P023770 | 0.0233  | 2.6145 | up         | 2052.43               | 1168.90            | Unknown    |
| A_87_P158638 | 0.0320  | 2.9393 | up         | 1893.88               | 972.62             | SLCO1B3    |
| A_87_P034912 | 0.0135  | 2.4772 | up         | 1504.71               | 855.34             | ITM2C      |
| A_87_P309777 | 0.0403  | 3.1039 | up         | 415.25                | 200.11             | Unknown    |
| A_87_P177233 | 0.0115  | 2.9469 | up         | 382.11                | 184.15             | Unknown    |
| A_87_P011704 | 0.0478  | 8.1813 | up         | 443.44                | 86.93              | Unknown    |
| A_87_P094056 | 0.0015  | 2.7755 | up         | 285.54                | 144.89             | Unknown    |
| A_87_P307413 | 0.0331  | 2.5736 | up         | 247.74                | 141.09             | VAV2       |
| A_87_P152483 | 0.0188  | 3.7106 | up         | 244.17                | 96.53              | FREM1      |

**Table S1-2** Downregulation of differentially expressed genes in the spleen in group SP with  $FC \geq 2$  and Signal Density of Raw Data  $\geq 100$ .

| ProbeName    | p-value | FC     | Regulation | GROUP<br>SP(Raw_data) | CONTROL_(Raw_data) | GeneSymbol |
|--------------|---------|--------|------------|-----------------------|--------------------|------------|
| A_87_P263263 | 0.0337  | 3.7427 | down       | 15599.45              | 72900.14           | RSFR       |
| A_87_P024462 | 0.0428  | 2.6697 | down       | 2296.36               | 9102.05            | Unknown    |
| A_87_P009488 | 0.0477  | 2.6393 | down       | 1483.44               | 4893.00            | MERTK      |
| A_87_P002428 | 0.0352  | 2.5310 | down       | 1403.64               | 5026.98            | Unknown    |
| A_87_P021714 | 0.0162  | 2.3141 | down       | 467.72                | 1469.43            | RAB32      |
| A_87_P311142 | 0.0385  | 2.3097 | down       | 8515.84               | 25377.76           | Unknown    |
| A_87_P155463 | 0.0420  | 2.1985 | down       | 1043.95               | 3037.73            | TPRN       |
| A_87_P106828 | 0.0105  | 2.1289 | down       | 685.27                | 1982.21            | TMEM140    |
| A_87_P119743 | 0.0104  | 2.1078 | down       | 1086.69               | 3119.70            | Unknown    |
| A_87_P036207 | 0.0202  | 2.0998 | down       | 3873.45               | 10873.39           | C3AR1      |

**Table S2-1** Upregulation of differentially expressed genes in the spleen in group SE with FC $\geq$  2 and Signal Density of Raw Data  $\geq$ 100.

| ProbeName    | p-value | FC     | Regulation | GROUP<br>SE(RAW_DATA) | CONTROL(RAW_DATA) | GeneSymbol |
|--------------|---------|--------|------------|-----------------------|-------------------|------------|
| A_87_P116658 | 0.0261  | 2.8863 | up         | 43378.40              | 18276.59          |            |
| A_87_P017937 | 0.0113  | 2.9774 | up         | 29694.70              | 12650.07          |            |
| A_87_P300758 | 0.0031  | 2.1611 | up         | 16723.76              | 9607.29           | ATP1A1     |
| A_87_P054071 | 0.0128  | 2.1016 | up         | 15168.78              | 8858.81           | CIRBP      |
| A_87_P009358 | 0.0377  | 2.0595 | up         | 10933.91              | 6790.29           | TGFB3      |
| A_87_P128243 | 0.0461  | 2.0723 | up         | 10872.15              | 6718.23           | TGFB3      |
| A_87_P009201 | 0.0443  | 2.3729 | up         | 7060.30               | 3823.04           | CTSD       |
| A_87_P009546 | 0.0002  | 2.1524 | up         | 5226.66               | 3026.52           | ATP1A1     |
| A_87_P015764 | 0.0029  | 3.4883 | up         | 4564.30               | 1611.47           |            |
| A_87_P037826 | 0.0268  | 2.1204 | up         | 4242.24               | 2488.16           | SPRY1      |
| A_87_P057585 | 0.0101  | 2.0849 | up         | 3599.72               | 2167.43           | ACTA2      |
| A_87_P006702 | 0.0053  | 2.4163 | up         | 3576.10               | 1867.09           |            |
| A_87_P009800 | 0.0136  | 2.1009 | up         | 3359.74               | 1945.28           | PTRF       |
| A_87_P012337 | 0.0114  | 2.3253 | up         | 2830.29               | 1480.60           | MAFF       |
| A_87_P093886 | 0.0005  | 2.0960 | up         | 2482.78               | 1472.80           | LOC422179  |
| A_87_P113483 | 0.0113  | 2.0754 | up         | 1548.61               | 906.54            | TFPI       |
| A_87_P063651 | 0.0259  | 2.2563 | up         | 1322.75               | 733.79            | G0S2       |
| A_87_P054871 | 0.0190  | 2.0980 | up         | 1190.79               | 720.97            | RGS4       |
| A_87_P126458 | 0.0308  | 2.3923 | up         | 1078.64               | 532.25            |            |
| A_87_P021537 | 0.0092  | 2.1109 | up         | 1054.81               | 630.69            | RGS4       |
| A_87_P011006 | 0.0298  | 2.1782 | up         | 751.33                | 440.28            | ENOPH1     |
| A_87_P193858 | 0.0254  | 2.4060 | up         | 748.50                | 392.53            | TAGLN      |
| A_87_P007472 | 0.0155  | 2.2673 | up         | 591.55                | 331.69            |            |
| A_87_P023735 | 0.0371  | 2.5534 | up         | 564.49                | 284.07            | CA5B       |
| A_87_P114813 | 0.0116  | 2.1780 | up         | 560.23                | 312.30            | TFPI       |
| A_87_P053141 | 0.0275  | 2.4644 | up         | 559.32                | 288.93            | TAGLN      |
| A_87_P031921 | 0.0052  | 2.0564 | up         | 521.13                | 318.24            | SEC14L2    |
| A_87_P017770 | 0.0096  | 2.7064 | up         | 517.53                | 230.91            | CXCR7      |
| A_87_P290988 | 0.0069  | 2.6124 | up         | 484.74                | 231.39            | COL6A3     |
| A_87_P037837 | 0.0074  | 2.1143 | up         | 476.64                | 276.35            | PDLIM4     |
| A_87_P196268 | 0.0299  | 2.1667 | up         | 471.38                | 272.22            | LPL        |
| A_87_P116118 | 0.0021  | 2.8828 | up         | 465.19                | 199.74            |            |
| A_87_P021557 | 0.0034  | 2.1640 | up         | 419.15                | 238.16            | TFPI       |
| A_87_P073586 | 0.0186  | 2.1313 | up         | 373.87                | 211.34            |            |
| A_87_P056971 | 0.0383  | 2.2831 | up         | 370.12                | 194.49            | LPL        |
| A_87_P133583 | 0.0314  | 2.4050 | up         | 321.89                | 170.86            | TAGLN      |
| A_87_P051101 | 0.0216  | 2.9783 | up         | 302.98                | 120.78            | TNIP2      |
| A_87_P023932 | 0.0369  | 2.4445 | up         | 271.35                | 130.52            |            |
| A_87_P084991 | 0.0035  | 2.8191 | up         | 268.47                | 119.95            |            |
| A_87_P079216 | 0.0163  | 2.3986 | up         | 238.48                | 121.44            | ST3GAL3    |

|              |        |        |    |        |        |           |
|--------------|--------|--------|----|--------|--------|-----------|
| A_87_P124693 | 0.0198 | 2.3824 | up | 230.19 | 117.59 |           |
| A_87_P013987 | 0.0337 | 2.6960 | up | 225.49 | 107.47 |           |
| A_87_P229933 | 0.0059 | 2.4065 | up | 215.28 | 112.98 | LOC416032 |
| A_87_P012660 | 0.0497 | 2.7031 | up | 193.91 | 84.48  |           |
| A_87_P008994 | 0.0202 | 2.3507 | up | 192.92 | 104.36 | KCNJ8     |
| A_87_P078396 | 0.0008 | 2.8549 | up | 186.13 | 80.52  | REG4      |
| A_87_P102461 | 0.0075 | 2.2448 | up | 171.79 | 95.92  | LOC776557 |
| A_87_P024344 | 0.0431 | 2.9563 | up | 154.14 | 63.08  | CREB3L3   |
| A_87_P069301 | 0.0162 | 2.6927 | up | 124.60 | 55.81  | WSCD2     |
| A_87_P109288 | 0.0265 | 2.0863 | up | 119.30 | 69.54  | CXADR     |

**Table S2-2** Downregulation of differentially expressed genes in the spleen in group SE with  $FC \geq 2$  and Signal Density of Raw Data  $\geq 100$ .

| ProbeName    | p-value | FC     | Regulation | GROUP<br>SE(RAW_DATA) | CONTROL(RAW_DATA) | GeneSymbol |
|--------------|---------|--------|------------|-----------------------|-------------------|------------|
| A_87_P054276 | 0.0447  | 2.0652 | down       | 16448.06              | 43485.36          | SEPP1      |
| A_87_P014410 | 0.0324  | 2.1137 | down       | 559.10                | 1503.89           | Unknown    |
| A_87_P013310 | 0.0011  | 2.2054 | down       | 487.68                | 1341.91           | NFYA       |
| A_87_P105043 | 0.0280  | 7.7681 | down       | 472.24                | 4752.52           | RIMS2      |
| A_87_P018662 | 0.0057  | 2.0215 | down       | 384.47                | 969.83            | LOC417740  |
| A_87_P094796 | 0.0299  | 2.3384 | down       | 281.53                | 841.93            | TMEM192    |
| A_87_P024624 | 0.0153  | 3.2553 | down       | 257.03                | 1064.79           | Unknown    |
| A_87_P013373 | 0.0030  | 2.6872 | down       | 204.34                | 681.21            | Unknown    |
| A_87_P017706 | 0.0309  | 3.6033 | down       | 179.42                | 834.44            | MPZL3      |
| A_87_P111278 | 0.0150  | 2.2338 | down       | 178.27                | 483.12            | LOC418927  |
| A_87_P016037 | 0.0384  | 2.1368 | down       | 152.10                | 384.82            | Unknown    |
| A_87_P014829 | 0.0356  | 2.1536 | down       | 132.27                | 349.11            | Unknown    |
| A_87_P011380 | 0.0345  | 2.0770 | down       | 126.28                | 330.35            | Unknown    |
| A_87_P026669 | 0.0100  | 5.3427 | down       | 117.76                | 803.74            | LOC771876  |
| A_87_P114948 | 0.0330  | 4.2311 | down       | 110.76                | 616.50            | C6H10orf71 |
| A_87_P065136 | 0.0210  | 3.4744 | down       | 106.61                | 475.74            | MPZL3      |

**Table S3-1** Upregulation of differentially expressed genes in the spleen in group Poly(I:C) with  $FC \geq 2$  and Signal Density of Raw Data  $\geq 100$ .

| ProbeName    | p-value  | FC       | Regulation | GROUP<br>POLY(I:C)(RAW_DATA) | CONTROL(RAW_DATA) | GeneSymbol            |
|--------------|----------|----------|------------|------------------------------|-------------------|-----------------------|
| A_87_P057585 | 0.024516 | 2.105607 | up         | 2927.151                     | 2167.429          | ACTA2                 |
| A_87_P012813 | 0.045663 | 2.02824  | up         | 2914.729                     | 2273.507          | UTS2D                 |
| A_87_P107513 | 0.042305 | 2.025086 | up         | 2386.644                     | 1819.623          | CKAP4                 |
| A_87_P018301 | 0.019989 | 2.002368 | up         | 2140.571                     | 1662.255          |                       |
| A_87_P069601 | 0.019984 | 7.549002 | up         | 2029.871                     | 424.2184          | VPREB3                |
| A_87_P121898 | 0.024996 | 4.438685 | up         | 1781.27                      | 608.2567          |                       |
| A_87_P249113 | 0.038541 | 2.178563 | up         | 1417.42                      | 1025.3            | JARID1A               |
| A_87_P053436 | 0.005433 | 2.1703   | up         | 1417.062                     | 1020.713          | MIS12                 |
| A_87_P115598 | 0.017036 | 2.358013 | up         | 1325.665                     | 872.1884          | COL4A1                |
| A_87_P014094 | 0.015296 | 2.444043 | up         | 1167.924                     | 746.7803          | RBM16                 |
| A_87_P324877 | 0.003539 | 2.401552 | up         | 1150.94                      | 749.7606          |                       |
| A_87_P055971 | 0.002829 | 2.313432 | up         | 1037.796                     | 699.4371          | LOC427896             |
| A_87_P014007 | 0.017124 | 2.305064 | up         | 876.8105                     | 590.411           |                       |
| A_87_P175073 | 0.003958 | 2.146015 | up         | 874.8078                     | 636.5988          | 11-Sep                |
| A_87_P104643 | 0.040575 | 2.018552 | up         | 761.3413                     | 593.6819          | C8orf70               |
| A_87_P022970 | 0.044222 | 2.289751 | up         | 693.0373                     | 478.6051          | AMOT                  |
| A_87_P149298 | 0.040277 | 2.00665  | up         | 650.3829                     | 504.2125          | FIBIN                 |
| A_87_P124003 | 0.026831 | 2.047612 | up         | 634.8118                     | 485.4089          | MAP7D1                |
| A_87_P314777 | 0.005215 | 2.462464 | up         | 628.238                      | 399.3048          |                       |
| A_87_P096116 | 0.049756 | 2.301085 | up         | 565.8392                     | 376.5663          | RASL11B               |
| A_87_P188610 | 0.01939  | 3.557655 | up         | 522.7618                     | 229.4975          |                       |
| A_87_P015444 | 0.025249 | 2.494155 | up         | 512.5837                     | 323.0428          | CNST                  |
| A_87_P081041 | 0.023942 | 2.596892 | up         | 500.9981                     | 299.9647          | C6H10orf26            |
| A_87_P022659 | 0.01852  | 3.325711 | up         | 470.723                      | 222.9621          |                       |
| A_87_P086317 | 0.039026 | 3.464577 | up         | 468.7569                     | 216.0263          |                       |
| A_87_P115118 | 0.03057  | 2.098877 | up         | 458.5415                     | 342.3074          |                       |
| A_87_P088946 | 0.00375  | 2.241603 | up         | 448.6629                     | 312.2088          |                       |
| A_87_P023735 | 0.008586 | 2.370335 | up         | 432.2021                     | 284.0674          | CA5B                  |
| A_87_P169628 | 0.047119 | 2.073145 | up         | 403.7709                     | 305.6135          | APC2                  |
| A_87_P021960 | 0.026986 | 2.007402 | up         | 403.451                      | 316.2714          | TMEM16A               |
| A_87_P000312 | 0.002176 | 2.137232 | up         | 372.4648                     | 271.8559          | COL22A1               |
| A_87_P308042 | 0.012653 | 2.188258 | up         | 350.3798                     | 249.8521          | CHD7                  |
| A_87_P225408 | 0.007312 | 2.801035 | up         | 338.4166                     | 187.8141          | SLC23A1               |
| A_87_P011329 | 0.001563 | 2.005109 | up         | 330.2014                     | 257.0186          | MACF1                 |
| A_87_P027387 | 0.031404 | 2.028113 | up         | 312.8605                     | 239.3172          | LOC770787             |
| A_87_P073186 | 0.034485 | 2.219931 | up         | 287.0286                     | 202.2863          |                       |
| A_87_P015822 | 0.023102 | 2.614387 | up         | 274.3423                     | 164.0744          | GROUP<br>POLY(I:C)AL3 |
| A_87_P015055 | 0.037505 | 3.243896 | up         | 265.8974                     | 124.9142          |                       |
| A_87_P033365 | 0.01548  | 2.274323 | up         | 255.4082                     | 175.5869          |                       |

|              |          |          |    |          |          |           |
|--------------|----------|----------|----|----------|----------|-----------|
| A_87_P037881 | 0.0132   | 2.54134  | up | 253.1551 | 154.6555 | SOUL      |
| A_87_P022624 | 0.018903 | 2.095799 | up | 251.8418 | 188.1497 |           |
| A_87_P011977 | 0.007772 | 2.044948 | up | 247.4453 | 188.718  | CCDC132   |
| A_87_P016435 | 0.009102 | 2.119412 | up | 221.1672 | 163.1128 | SACS      |
| A_87_P105108 | 0.011071 | 2.182471 | up | 211.8441 | 151.1036 | TRPS1     |
| A_87_P022669 | 0.006365 | 2.004091 | up | 193.1924 | 150.6822 |           |
| A_87_P072551 | 0.03794  | 2.446547 | up | 190.3246 | 119.4279 | SLC23A1   |
| A_87_P122043 | 0.015911 | 3.100986 | up | 187.8896 | 95.28166 | PTPRF     |
| A_87_P104513 | 0.019273 | 2.329722 | up | 186.4844 | 124.6192 | MYBL1     |
| A_87_P018117 | 0.045994 | 2.514816 | up | 174.9205 | 106.3156 |           |
| A_87_P036003 | 0.00641  | 3.325646 | up | 156.5304 | 73.68145 | CHTF18    |
| A_87_P102461 | 0.023168 | 2.373017 | up | 146.217  | 95.9227  | LOC776557 |
| A_87_P035829 | 0.00229  | 2.786086 | up | 132.1193 | 73.95721 | F2RL1     |
| A_87_P116918 | 0.010106 | 2.98085  | up | 127.1796 | 66.79111 |           |
| A_87_P087346 | 0.035268 | 2.007636 | up | 126.6924 | 98.15745 | LOC425228 |
| A_87_P125993 | 0.02429  | 2.768192 | up | 122.2763 | 69.94974 | GRIA3     |
| A_87_P012660 | 0.039436 | 2.004756 | up | 107.6599 | 84.48067 |           |
| A_87_P028170 | 0.006212 | 2.028803 | up | 103.0666 | 79.49775 | KREMEN1   |

**Table S3-2** Downregulation of differentially expressed genes in the spleen in group Poly(I:C) with FC $\geq$ 2 and Signal Density of Raw Data  $\geq$ 100.

| ProbeName    | p-value  | FC       | Regulation | GROUP<br>POLY(I:C)(RAW_DATA) | CONTROL(RAW_DATA) | GeneSymbol |
|--------------|----------|----------|------------|------------------------------|-------------------|------------|
| A_87_P263263 | 0.028744 | 2.441037 | down       | 19135.81                     | 72900.14          | RSFR       |
| A_87_P036207 | 0.00438  | 2.090177 | down       | 3328.199                     | 10873.39          | C3AR1      |
| A_87_P065896 | 0.01387  | 2.237272 | down       | 2799.326                     | 9824.017          |            |
| A_87_P055536 | 0.010562 | 2.07731  | down       | 2473.896                     | 8040.143          | SLBP       |
| A_87_P140493 | 0.012572 | 2.05147  | down       | 2469.863                     | 7889.899          | TLR16      |
| A_87_P058561 | 0.01154  | 2.000389 | down       | 2462.008                     | 7668.414          | TLR6       |
| A_87_P037907 | 0.005948 | 2.126369 | down       | 1933.563                     | 6433.736          | SDHA       |
| A_87_P193683 | 0.025462 | 2.009378 | down       | 1744.57                      | 5435.123          | ASL1       |
| A_87_P234808 | 0.048501 | 2.210926 | down       | 1732.258                     | 5893.944          | CTSS       |
| A_87_P072881 | 0.008154 | 3.689032 | down       | 1019.39                      | 5897.244          | ARL10      |
| A_87_P035265 | 0.01682  | 2.117106 | down       | 723.5488                     | 2404.719          | CDKN2A     |
| A_87_P107113 | 0.007747 | 2.062304 | down       | 711.5373                     | 2293.686          | PLBD1      |
| A_87_P106828 | 0.048876 | 2.119471 | down       | 606.9369                     | 1982.214          | TMEM140    |
| A_87_P067731 | 0.041078 | 2.149046 | down       | 576.5978                     | 1927.181          |            |
| A_87_P008724 | 0.010385 | 2.029664 | down       | 462.3438                     | 1468.822          | K123       |
| A_87_P022808 | 0.014186 | 2.046842 | down       | 401.2164                     | 1278.45           | MOG        |
| A_87_P008690 | 0.005182 | 2.585869 | down       | 398.9553                     | 1613.69           | GCH1       |
| A_87_P064081 | 0.001517 | 2.151078 | down       | 386.292                      | 1298.169          | STX12      |
| A_87_P240163 | 0.009681 | 2.053077 | down       | 376.8029                     | 1204.993          | MOG        |
| A_87_P156733 | 0.00434  | 2.299787 | down       | 350.1905                     | 1258.702          | STX12      |

|              |          |          |      |          |          |           |
|--------------|----------|----------|------|----------|----------|-----------|
| A_87_P193738 | 0.041475 | 2.611675 | down | 339.6667 | 1385.975 | LOC771069 |
| A_87_P019694 | 0.008127 | 3.497982 | down | 297.4808 | 1635.84  | LYG2      |
| A_87_P297403 | 0.005567 | 2.111812 | down | 225.356  | 742.1928 | NPL       |
| A_87_P008921 | 0.031571 | 2.03715  | down | 214.3319 | 676.5514 | HMOX1     |
| A_87_P065486 | 0.022738 | 2.652414 | down | 212.2025 | 886.1909 | LOC771069 |
| A_87_P023106 | 0.031828 | 2.573704 | down | 201.0348 | 815.4284 | PLBD1     |
| A_87_P021050 | 0.015256 | 2.092198 | down | 169.0554 | 551.4033 |           |
| A_87_P263168 | 0.048082 | 2.655546 | down | 155.2642 | 649.6974 | PLBD1     |
| A_87_P021085 | 0.017394 | 2.644538 | down | 149.0411 | 615.71   | PLCXD1    |
| A_87_P030656 | 0.004543 | 2.298788 | down | 126.5286 | 454.2228 | LOC769044 |

**Table S4-1** Upregulation of differentially expressed genes in the caecum in group SP with  $FC \geq 2$  and Signal Density of Raw Data  $\geq 100$ .

| ProbeName    | p-value  | FC       | Regulation | GROUP<br>SP(RAW_DATA) | CONTROL(RAW_DATA) | GeneSymbol  |
|--------------|----------|----------|------------|-----------------------|-------------------|-------------|
| A_87_P017067 | 0.014833 | 2.241353 | up         | 27158.97              | 10506.86          | CLEC3B      |
| A_87_P055986 | 0.026444 | 2.048135 | up         | 9172.174              | 3898.472          | PDLIM3      |
| A_87_P110393 | 0.044918 | 2.134904 | up         | 8211.222              | 3363.067          | FHL2        |
| A_87_P193418 | 0.046498 | 2.219647 | up         | 7528.244              | 2944.842          | FHL2        |
| A_87_P213848 | 0.026094 | 2.937232 | up         | 6073.972              | 1757.178          | LOC423423   |
| A_87_P265788 | 0.047425 | 2.028906 | up         | 5994.927              | 2552.497          | BAG2        |
| A_87_P055721 | 0.004181 | 2.57088  | up         | 5538.785              | 1861.226          | HOXD11      |
| A_87_P009294 | 0.004336 | 2.365375 | up         | 3699.251              | 1356.083          | HOXD11      |
| A_87_P080001 | 0.006183 | 2.206574 | up         | 2488.212              | 976.5921          | CISD1       |
| A_87_P245708 | 0.033453 | 2.915283 | up         | 2122.973              | 633.1538          | ANLN        |
| A_87_P034042 | 0.040937 | 4.771468 | up         | 2106.639              | 398.8331          | ACTC1       |
| A_87_P051766 | 0.046243 | 2.132916 | up         | 1784.825              | 733.5394          | LOC418424   |
| A_87_P151068 | 0.008562 | 2.248188 | up         | 1701.529              | 656.2959          | MAMDC2      |
| A_87_P037492 | 0.021    | 2.189082 | up         | 1638.75               | 647.6197          | PDLIM3      |
| A_87_P009048 | 0.026677 | 2.046262 | up         | 1590.921              | 674.5408          | CENPF       |
| A_87_P085056 | 0.046133 | 2.137321 | up         | 1406.97               | 564.0237          | SCG5        |
| A_87_P092561 | 0.009984 | 2.567488 | up         | 1324.834              | 446.0624          | MAMDC2      |
| A_87_P114838 | 0.016724 | 3.038796 | up         | 1122.808              | 320.8924          |             |
| A_87_P014112 | 0.020187 | 2.337636 | up         | 932.2706              | 347.1294          |             |
| A_87_P152008 | 0.004968 | 2.519559 | up         | 775.9677              | 266.9718          | KLHDC8A     |
| A_87_P016444 | 0.016629 | 2.245398 | up         | 760.8056              | 292.9314          |             |
| A_87_P027905 | 0.019624 | 2.050455 | up         | 704.9199              | 299.1262          | COMP        |
| A_87_P084681 | 0.037432 | 2.011036 | up         | 652.0169              | 279.2924          |             |
| A_87_P121843 | 4.89E-04 | 2.784071 | up         | 562.507               | 175.1498          |             |
| A_87_P054746 | 0.021351 | 2.122426 | up         | 545.0016              | 223.2091          | CENPF       |
| A_87_P102401 | 0.003087 | 2.933887 | up         | 352.884               | 104.1954          | ANLN        |
| A_87_P024218 | 0.017541 | 2.21491  | up         | 335.0634              | 132.1076          |             |
| A_87_P236533 | 0.046516 | 7.077659 | up         | 318.3763              | 37.00138          | C20H20orf85 |



|              |          |          |    |          |          |           |
|--------------|----------|----------|----|----------|----------|-----------|
| A_87_P104513 | 0.002662 | 3.046689 | up | 315.2515 | 89.91791 | MYBL1     |
| A_87_P083891 | 0.045104 | 2.080555 | up | 312.0908 | 129.332  |           |
| A_87_P179618 | 0.018637 | 3.150793 | up | 305.2546 | 84.68122 | LOC768920 |
| A_87_P319922 | 0.024433 | 3.271542 | up | 299.3379 | 78.5472  | LOC768920 |
| A_87_P022300 | 0.046964 | 2.042768 | up | 291.6057 | 122.5599 | RIC3      |
| A_87_P145383 | 0.039066 | 2.329995 | up | 282.5269 | 105.3242 | SLIT1     |
| A_87_P032570 | 0.043419 | 2.858929 | up | 247.6722 | 73.61479 |           |
| A_87_P122863 | 0.032068 | 6.574216 | up | 246.7759 | 33.84986 |           |
| A_87_P104908 | 0.009377 | 2.041087 | up | 208.8738 | 88.86916 | OSR2      |
| A_87_P133328 | 0.001833 | 2.051884 | up | 201.0862 | 84.97775 |           |
| A_87_P021436 | 0.04428  | 2.539008 | up | 183.9284 | 63.00039 | TUB       |
| A_87_P037697 | 0.043356 | 3.221175 | up | 163.8235 | 45.27623 | COL20A1   |
| A_87_P014431 | 0.030014 | 2.533612 | up | 162.5813 | 56.09332 |           |
| A_87_P011901 | 0.002521 | 2.03188  | up | 161.1629 | 68.68959 |           |
| A_87_P296773 | 0.039883 | 2.340923 | up | 156.9485 | 58.23907 | ALDH1L2   |
| A_87_P037881 | 0.00596  | 3.139463 | up | 155.8588 | 43.17721 | SOUL      |
| A_87_P018115 | 0.041883 | 2.215137 | up | 152.6586 | 58.6579  |           |
| A_87_P053201 | 0.026585 | 2.044309 | up | 141.0832 | 59.69648 | SYNPR     |
| A_87_P037934 | 0.034472 | 8.460807 | up | 139.0743 | 15.11028 | GDF5      |
| A_87_P056771 | 0.021345 | 2.403871 | up | 131.1553 | 47.09236 | GLP1R     |
| A_87_P012994 | 0.011458 | 2.221206 | up | 123.0653 | 47.83742 |           |
| A_87_P106548 | 0.033798 | 2.003954 | up | 122.4247 | 53.13174 | TRHDE     |
| A_87_P101681 | 0.006572 | 2.674664 | up | 117.2865 | 37.99509 | DGKB      |
| A_87_P054406 | 0.029114 | 2.063656 | up | 110.2237 | 46.68424 | OXTR      |

**Table S4-2** Downregulation of differentially expressed genes in the caecum in group SP with  $FC \geq 2$  and Signal Density of Raw Data  $\geq 100$ .

| ProbeName    | p-value  | FC       | Regulation | GROUP<br>SP(RAW_DATA) | CONTROL(RAW_DATA) | GeneSymbol |
|--------------|----------|----------|------------|-----------------------|-------------------|------------|
| A_87_P081341 | 0.008753 | 2.100018 | down       | 5147.149              | 9383.597          | LOC423942  |
| A_87_P124573 | 0.018046 | 2.063123 | down       | 4147.323              | 7464.053          | MOV10      |
| A_87_P034814 | 0.007111 | 2.76483  | down       | 2803.302              | 6681.683          | IFIT5      |
| A_87_P081336 | 0.008268 | 2.142918 | down       | 2141.293              | 3960.148          | LOC423942  |
| A_87_P275528 | 0.028744 | 2.018683 | down       | 1590.584              | 2771.403          | PSAP       |
| A_87_P094106 | 0.046616 | 2.009193 | down       | 998.6245              | 1720.768          | GPR112     |
| A_87_P315787 | 0.01107  | 2.017383 | down       | 404.4446              | 704.7305          | PARP14     |
| A_87_P150528 | 0.031356 | 2.081949 | down       | 399.3919              | 724.4912          |            |
| A_87_P220458 | 0.026499 | 2.00207  | down       | 397.9784              | 687.4885          |            |
| A_87_P260193 | 0.034129 | 2.359568 | down       | 337.3372              | 698.2982          |            |
| A_87_P090556 | 0.015171 | 2.133231 | down       | 227.6391              | 420.3683          |            |
| A_87_P129690 | 0.012764 | 2.245596 | down       | 218.1902              | 424.9018          | CATHL3     |
| A_87_P017222 | 0.022391 | 2.159531 | down       | 196.3387              | 370.0386          |            |
| A_87_P073026 | 0.004324 | 2.827911 | down       | 173.2249              | 423.5829          |            |

|              |          |          |      |          |          |       |
|--------------|----------|----------|------|----------|----------|-------|
| A_87_P263168 | 0.027271 | 2.157093 | down | 171.706  | 317.8527 | PLBD1 |
| A_87_P018024 | 0.028947 | 12.86841 | down | 147.5546 | 1823.653 | CD72  |
| A_87_P022808 | 0.042314 | 2.469146 | down | 122.4936 | 258.4686 | MOG   |
| A_87_P016668 | 0.039132 | 2.424182 | down | 118.4504 | 252.0765 | CILP  |

**Table S5-1** Upregulation of differentially expressed genes in the caecum in group SE with  $FC \geq 2$  and Signal Density of Raw Data  $\geq 100$ .

| ProbeName    | p-value  | FC       | Regulation | GROUP<br>SE(RAW_DATA) | CONTROL(RAW_DATA) | GeneSymbol |
|--------------|----------|----------|------------|-----------------------|-------------------|------------|
| A_87_P014973 | 0.020842 | 17.84019 | up         | 1016.454              | 49.31717          |            |
| A_87_P167163 | 0.004804 | 2.085917 | up         | 693.1338              | 300.2516          |            |
| A_87_P324787 | 0.028186 | 2.833615 | up         | 84509.34              | 26702.72          | LOC771291  |
| A_87_P105598 | 0.014049 | 2.085026 | up         | 129.2328              | 55.79695          |            |
| A_87_P262868 | 0.040523 | 2.148635 | up         | 939.7851              | 391.43            | PDE9A      |
| A_87_P093371 | 0.008223 | 2.488489 | up         | 327.6603              | 118.3814          | LINGO2     |
| A_87_P050041 | 0.036331 | 3.017808 | up         | 102.1938              | 31.13181          | SLC18A3    |
| A_87_P078321 | 0.026316 | 2.008928 | up         | 3539.299              | 1589.067          | RGS5       |
| A_87_P012632 | 0.017713 | 2.076617 | up         | 4341.877              | 1871.128          |            |
| A_87_P055721 | 0.002503 | 2.051615 | up         | 4243.532              | 1861.226          | HOXD11     |
| A_87_P023396 | 0.045685 | 2.151921 | up         | 5636.413              | 2364.565          | SLC5A9     |
| A_87_P146423 | 0.039847 | 2.864879 | up         | 134180.9              | 41637.73          | MT4        |
| A_87_P015825 | 0.036988 | 2.103959 | up         | 1296.175              | 559.201           | PPP1R14C   |
| A_87_P007845 | 0.009348 | 2.734872 | up         | 663.7703              | 217.8311          | LOC771291  |
| A_87_P037881 | 0.031403 | 2.989617 | up         | 143.7049              | 43.17721          | SOUL       |
| A_87_P013037 | 0.046313 | 2.03394  | up         | 4559.297              | 2033.95           | ABHD6      |
| A_87_P055036 | 0.027605 | 5.717663 | up         | 409.6541              | 66.92852          | CL2        |
| A_87_P028710 | 0.006318 | 4.145064 | up         | 10236.29              | 2232.66           | SLC13A2    |
| A_87_P202443 | 0.04063  | 3.39792  | up         | 105451.5              | 27249.55          | MT4        |
| A_87_P024407 | 0.012672 | 16.21543 | up         | 162.0195              | 8.613574          | SEBOX      |
| A_87_P023409 | 0.048755 | 5.266966 | up         | 299.0122              | 48.23381          | NSF        |
| A_87_P096116 | 0.004699 | 3.170034 | up         | 2761.577              | 786.9977          | RASL11B    |

**Table S5-2** Downregulation of differentially expressed genes in the caecum in group SE with  $FC \geq 2$  and Signal Density of Raw Data  $\geq 100$ .

| ProbeName    | p-value  | FC       | Regulation | GROUP<br>SE(RAW_DATA) | CONTROL(RAW_DATA) | GeneSymbol |
|--------------|----------|----------|------------|-----------------------|-------------------|------------|
| A_87_P091316 | 0.026362 | 2.798214 | down       | 132.564               | 339.9412          | LOC770431  |
| A_87_P129978 | 0.034031 | 2.929382 | down       | 332.9392              | 889.0701          | LOC426330  |
| A_87_P090256 | 0.04415  | 2.375634 | down       | 136.039               | 295.3577          | CHIR-AB1   |
| A_87_P037011 | 0.017321 | 2.244148 | down       | 272.4023              | 553.4141          | NCF1       |
| A_87_P117488 | 0.04391  | 2.026281 | down       | 957.6114              | 1751.608          | SLC31A2    |

|              |          |          |      |          |          |           |
|--------------|----------|----------|------|----------|----------|-----------|
| A_87_P129888 | 0.048704 | 2.413237 | down | 625.6784 | 1350.403 |           |
| A_87_P116628 | 0.03748  | 2.422412 | down | 3052.228 | 6712.746 | CLIC2     |
| A_87_P038224 | 0.023787 | 2.275201 | down | 142.9307 | 292.5867 | PSAP      |
| A_87_P063616 | 0.031775 | 2.251122 | down | 3384.81  | 6916.481 | LOC771877 |
| A_87_P129963 | 0.02664  | 2.896826 | down | 462.0664 | 1209.644 |           |
| A_87_P195668 | 0.041027 | 2.269247 | down | 9640.238 | 19603.02 | CTSH      |
| A_87_P090306 | 0.025731 | 2.428305 | down | 118.2441 | 262.0523 | LOC425113 |
| A_87_P022311 | 0.031961 | 2.097193 | down | 641.5574 | 1211.964 | CNRIP1    |
| A_87_P082566 | 0.039744 | 2.490633 | down | 147.1333 | 327.6644 | FAP       |
| A_87_P134688 | 0.036334 | 2.406621 | down | 1609.516 | 3554.54  | C20orf42  |
| A_87_P170028 | 0.02129  | 2.418963 | down | 142.0877 | 312.0223 |           |
| A_87_P028667 | 0.040998 | 3.16637  | down | 302.4254 | 884.3738 | CENTA2    |
| A_87_P091001 | 0.042836 | 2.133442 | down | 230.8228 | 442.3807 | LOC771258 |
| A_87_P021759 | 0.036146 | 3.010039 | down | 311.5055 | 843.6882 | LOC417192 |
| A_87_P132743 | 0.002793 | 2.438193 | down | 310.1846 | 682.4832 |           |
| A_87_P132785 | 0.00624  | 3.196407 | down | 469.2683 | 1352.766 |           |
| A_87_P250273 | 0.034193 | 2.13936  | down | 294.4136 | 573.1051 | ITGB2     |
| A_87_P149603 | 0.049236 | 2.823932 | down | 501.6462 | 1265.674 | LOC421099 |
| A_87_P122853 | 0.006265 | 2.158789 | down | 4384.928 | 8504.026 |           |
| A_87_P132808 | 0.017809 | 2.929734 | down | 573.1385 | 1509.634 |           |
| A_87_P014773 | 0.031846 | 3.321809 | down | 169.1831 | 518.9665 |           |
| A_87_P065896 | 0.040972 | 3.256397 | down | 1213.196 | 3590.312 |           |
| A_87_P035946 | 0.026552 | 2.846739 | down | 806.4634 | 2101.139 | GSDMA     |
| A_87_P147948 | 0.040886 | 3.264982 | down | 711.2198 | 2118.651 | LOC771877 |
| A_87_P008850 | 0.031357 | 2.22686  | down | 248.4611 | 504.1104 | ITGB2     |
| A_87_P092256 | 0.037905 | 2.159178 | down | 119.2861 | 234.1683 | LOC769117 |
| A_87_P009677 | 0.047268 | 2.704191 | down | 4235.871 | 10169.62 | DNASE2B   |
| A_87_P132768 | 0.048015 | 3.032471 | down | 523.8539 | 1420.796 |           |
| A_87_P058371 | 0.035593 | 2.56755  | down | 1164.157 | 2708.206 | TLR4      |
| A_87_P022555 | 0.018513 | 2.496512 | down | 5844.545 | 13280.83 | C1QA      |
| A_87_P012535 | 0.033289 | 2.120312 | down | 151.6456 | 285.7086 | FCN2      |
| A_87_P086412 | 0.024455 | 2.712421 | down | 442.2019 | 1095.675 |           |
| A_87_P036207 | 0.037717 | 3.275309 | down | 2033.046 | 6092.049 | C3AR1     |
| A_87_P025636 | 0.00897  | 2.237158 | down | 191.6863 | 388.3333 |           |
| A_87_P089381 | 0.033139 | 2.799693 | down | 817.3422 | 2097.225 |           |
| A_87_P310842 | 0.010904 | 2.996206 | down | 297.6038 | 802.3868 |           |
| A_87_P051526 | 0.049502 | 3.292744 | down | 10625.37 | 32478.58 | LOC417536 |
| A_87_P263263 | 0.016489 | 5.333937 | down | 9668.349 | 45843.88 | RSFR      |
| A_87_P087212 | 0.043692 | 2.304121 | down | 782.1324 | 1638.964 |           |
| A_87_P220458 | 0.02558  | 2.23014  | down | 341.6007 | 687.4885 |           |
| A_87_P008872 | 0.006767 | 4.21702  | down | 38542.8  | 146529.7 | RSFR      |
| A_87_P058641 | 0.040571 | 3.017167 | down | 550.9206 | 1500.559 | CHIR-B3   |
| A_87_P087131 | 0.012217 | 2.650401 | down | 517.3791 | 1235.945 |           |
| A_87_P221583 | 0.00117  | 2.097165 | down | 131.7905 | 249.306  | FAP       |

|              |          |          |      |          |          |           |
|--------------|----------|----------|------|----------|----------|-----------|
| A_87_P132858 | 0.047916 | 3.172536 | down | 377.8083 | 1074.51  |           |
| A_87_P058646 | 0.032244 | 2.069559 | down | 366.9934 | 683.4158 | CHIR-B4   |
| A_87_P056446 | 0.033853 | 2.234042 | down | 1280.009 | 2581.117 | ACSL1     |
| A_87_P076361 | 0.041976 | 2.141753 | down | 122.0077 | 238.6055 | LOC770352 |
| A_87_P130018 | 0.046061 | 2.697001 | down | 307.9935 | 748.9995 |           |
| A_87_P078111 | 0.006525 | 2.496402 | down | 569.6565 | 1283.287 | P2RY13    |
| A_87_P132888 | 0.049218 | 3.858826 | down | 834.7884 | 2805.653 | FCER1G    |
| A_87_P050996 | 0.015158 | 10.26013 | down | 856.0988 | 7853.291 | B-G       |
| A_87_P129778 | 0.028192 | 3.036991 | down | 462.6163 | 1269.174 |           |
| A_87_P306688 | 0.026473 | 2.971798 | down | 398.3714 | 1062.017 | CHIR-B3   |
| A_87_P014908 | 0.031702 | 3.435949 | down | 136.5117 | 434.6087 |           |
| A_87_P091306 | 0.030058 | 2.644811 | down | 154.2082 | 370.8103 |           |
| A_87_P020905 | 0.033782 | 3.723495 | down | 5275.214 | 17357.5  | FCER1G    |
| A_87_P091081 | 0.017436 | 3.062251 | down | 659.7219 | 1823.375 | LOC426330 |

**Table S6-1** Upregulation of differentially expressed genes in the caecum in group Poly(I:C) with  $FC \geq 2$  and Signal Density of Raw Data  $\geq 100$ .

| ProbeName    | p-value  | FC       | Regulation | GROUP<br>POLY(I:C)(RAW_DATA) | CONTROL(RAW_DATA) | GeneSymbol  |
|--------------|----------|----------|------------|------------------------------|-------------------|-------------|
| A_87_P037391 | 0.006664 | 2.703767 | up         | 29518.29                     | 10619.04          | SULT1C3     |
| A_87_P213848 | 1.68E-04 | 2.113179 | up         | 3804.491                     | 1757.178          | LOC423423   |
| A_87_P051766 | 0.035518 | 2.326937 | up         | 1730.728                     | 733.5394          | LOC418424   |
| A_87_P063816 | 0.004375 | 2.108062 | up         | 1169.931                     | 540.9439          | LOC419892   |
| A_87_P050036 | 0.013709 | 2.058164 | up         | 820.5958                     | 388.3044          | SOCS2       |
| A_87_P232208 | 0.008595 | 2.03741  | up         | 456.0847                     | 218.6075          | SOCS2       |
| A_87_P102401 | 0.011823 | 2.133296 | up         | 228.08                       | 104.1954          | ANLN        |
| A_87_P104513 | 0.007677 | 2.382035 | up         | 219.1868                     | 89.91791          | MYBL1       |
| A_87_P179618 | 0.029496 | 2.106558 | up         | 180.8519                     | 84.68122          | LOC768920   |
| A_87_P236533 | 0.034036 | 3.508875 | up         | 132.3831                     | 37.00138          | C20H20orf85 |

**Table S6-2** Downregulation of differentially expressed genes in the caecum in group Poly(I:C) with  $FC \geq 2$  and Signal Density of Raw Data  $\geq 100$ .

| ProbeName    | p-value  | FC       | Regulation | GROUP<br>POLY(I:C)(RAW_DATA) | CONTROL(RAW_DATA) | GeneSymbol |
|--------------|----------|----------|------------|------------------------------|-------------------|------------|
| A_87_P035933 | 0.039469 | 2.215196 | down       | 8762.724                     | 19238.58          | NFKBIZ     |
| A_87_P111728 | 0.02805  | 2.012913 | down       | 3700.156                     | 7311.152          | CTSC       |
| A_87_P124573 | 0.021516 | 2.234402 | down       | 3407.894                     | 7464.053          | MOV10      |
| A_87_P017535 | 0.044468 | 2.302525 | down       | 3098.57                      | 6972.997          |            |
| A_87_P024462 | 0.042179 | 2.211759 | down       | 2577.747                     | 5534.331          |            |
| A_87_P174103 | 0.012048 | 2.205112 | down       | 2432.484                     | 5247.165          | P2RX7      |
| A_87_P034814 | 0.001515 | 3.21136  | down       | 2133.253                     | 6681.683          | IFIT5      |
| A_87_P021556 | 0.019185 | 2.014075 | down       | 1571.214                     | 3097.13           | LOC416147  |
| A_87_P217653 | 0.026853 | 2.26771  | down       | 1182.391                     | 2619.817          | STAT1      |

|              |          |          |      |          |          |           |
|--------------|----------|----------|------|----------|----------|-----------|
| A_87_P072881 | 0.018247 | 3.137558 | down | 737.279  | 2243.917 | ARL10     |
| A_87_P110888 | 0.049583 | 2.248944 | down | 623.6538 | 1351.796 | EPSTI1    |
| A_87_P106828 | 0.036053 | 2.202654 | down | 620.0512 | 1317.762 | TMEM140   |
| A_87_P211953 | 0.019617 | 2.090299 | down | 510.0576 | 1039.841 | STAT1     |
| A_87_P081091 | 0.035285 | 2.37391  | down | 501.936  | 1147.516 | COL17A1   |
| A_87_P101556 | 0.030013 | 2.97034  | down | 460.8398 | 1318.066 | SAMD9L    |
| A_87_P115188 | 0.00655  | 2.287285 | down | 433.1795 | 966.6478 | STAT1     |
| A_87_P315787 | 0.0021   | 2.042609 | down | 353.3085 | 704.7305 | PARP14    |
| A_87_P019522 | 0.025044 | 2.451614 | down | 315.7911 | 760.3036 |           |
| A_87_P105043 | 0.017475 | 4.458349 | down | 309.3151 | 1324.275 |           |
| A_87_P014410 | 0.025478 | 2.959571 | down | 290.5617 | 840.4594 |           |
| A_87_P009753 | 0.022865 | 10.47075 | down | 177.3527 | 1703.509 | LOC420300 |
| A_87_P299338 | 0.00329  | 2.720574 | down | 153.426  | 407.0948 | SAMD9L    |
| A_87_P133573 | 0.011658 | 2.170783 | down | 123.9796 | 264.01   | CRTAM     |
| A_87_P015250 | 0.002682 | 3.436842 | down | 121.2566 | 406.9168 |           |
| A_87_P030818 | 0.021311 | 2.825544 | down | 120.5811 | 335.4609 |           |
| A_87_P161603 | 0.009158 | 2.850308 | down | 111.6946 | 309.99   |           |
| A_87_P110193 | 0.005713 | 2.19285  | down | 109.8248 | 234.6588 | PLCXD1    |

**Table S7** qRT-PCR primers for 5 target genes.

| Gene names | Direction | Primer                   | Tm (°C) |
|------------|-----------|--------------------------|---------|
| RSFR       | F         | AAGAAGAAGAAGGAAGAAGAG    | 59.7    |
|            | R         | GAACACCATAGCACATAGAC     | 60.8    |
| VPREB3     | F         | GAAGACAACGGTCGCTATT      | 62.9    |
|            | R         | TTGAGGGCAAATCTTTATTACATT | 61.6    |
| CD72       | F         | AATATGAGCAGCGTATCAGA     | 61.5    |
|            | R         | TATTGCCAAGTATCAAGGATG    | 60.5    |
| IL15       | F         | GATTCTGTTCTTCTGTTCTGAG   | 61.3    |
|            | R         | TTGGTACATAAGCACATAGGA    | 61.3    |
| GAL1       | F         | GTTCTTACTTCCTTGCTGTA     | 59.9    |
|            | R         | CATTCCCACTGATGAGAGT      | 62.2    |

**Table S8** Statistical description of the difference in the expression of genes in each group in the spleen

| Group     | No. of DEGs | Upregulated probes | Proportion of up-regulated probes | Down-regulated probes | Proportion of down-regulated probes |
|-----------|-------------|--------------------|-----------------------------------|-----------------------|-------------------------------------|
| SE        | 585         | 383                | 65.47%                            | 202                   | 34.53%                              |
| SP        | 743         | 508                | 68.37%                            | 235                   | 31.63%                              |
| Poly(I:C) | 903         | 579                | 64.12%                            | 324                   | 35.88%                              |

**Table S9** Statistical description of the difference in the expression of genes in each group in the caecum.

| Group     | No. of DEGs | upregulated probes | Proportion of upregulated probes | Downregulated Probes | Proportion of downregulated probes |
|-----------|-------------|--------------------|----------------------------------|----------------------|------------------------------------|
| SE        | 384         | 162                | 42.19%                           | 222                  | 57.81%                             |
| SP        | 488         | 285                | 58.40%                           | 203                  | 41.60%                             |
| Poly(I:C) | 296         | 129                | 43.58%                           | 167                  | 56.42%                             |
